# Supplementary material for: The Southampton-York Natural Scenes (SYNS) dataset: Statistics of surface attitude
Source: PubMed Central journal article supplement (PMC5080654; doi:10.1038/srep35805), 2016-10-26
Supplement: srep35805-s1.pdf [file srep35805-s1.pdf]

# The Southampton-York Natural Scenes (SYNS)

**dataset: Statistics of surface attitude:**

## Supplementary Information

Wendy J. Adams<sup>1\*</sup>, James H. Elder<sup>2</sup>, Erich W. Graf<sup>1</sup>, Julian Leyland<sup>3</sup>, Arthur J. Lughtigheid<sup>1</sup>, Alexander Murry<sup>1</sup>

1. Centre for Vision and Cognition, Psychology, University of Southampton, UK
2. Centre for Vision Research, York University, Canada
3. Geography and Environment, University of Southampton, UK

\*Corresponding author:

Wendy J. Adams  
Psychology,  
University of Southampton  
Southampton, SO17 1BJ  
ENGLAND

Tel: +011 (44) 0238059 3629  
Email: w.adams@soton.ac.uk

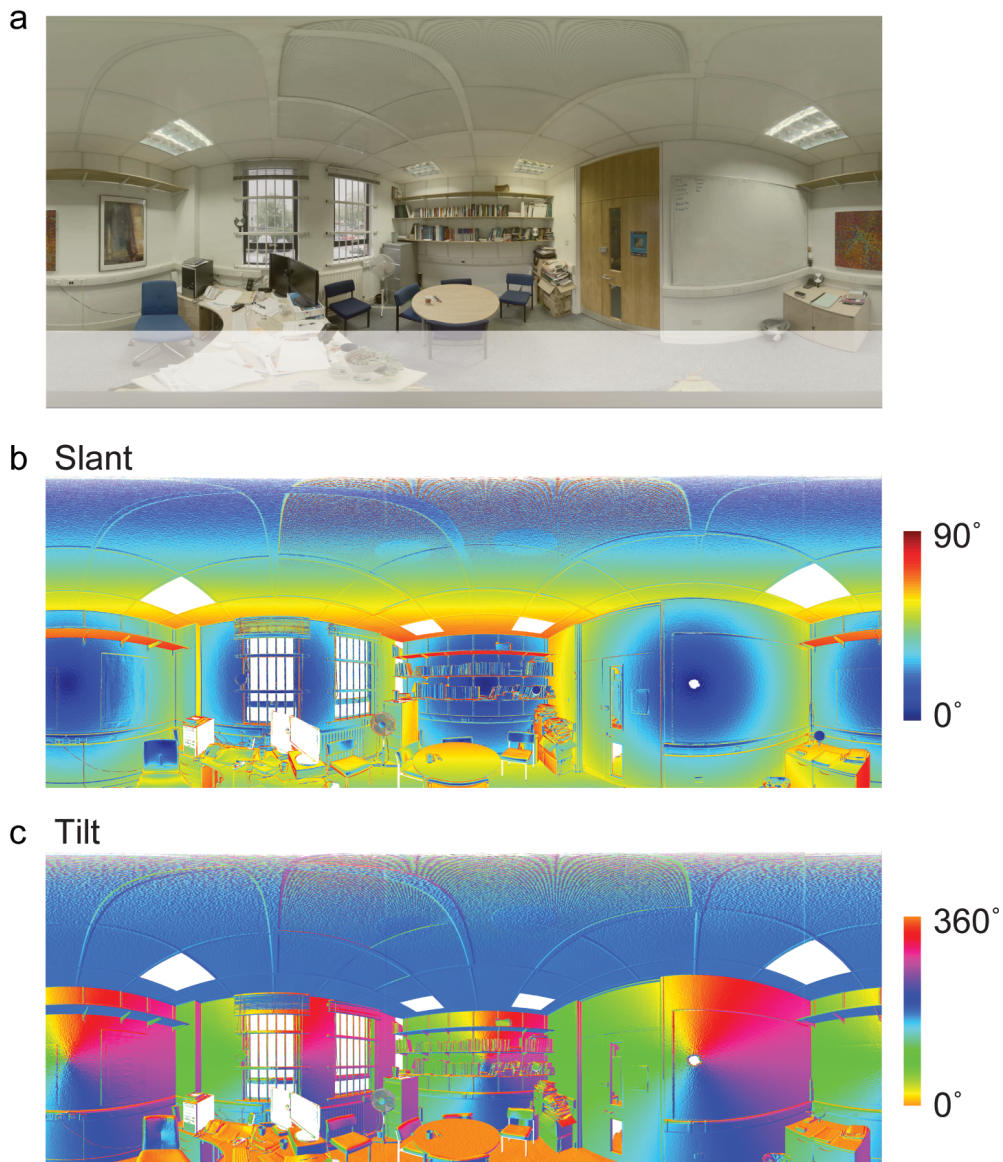

**Figure S1. Surface attitude estimation for an example indoor scene.** a) Spheron image; masked regions correspond to the low elevation region not captured by LiDAR. b) Egocentric slant. c) Egocentric tilt.

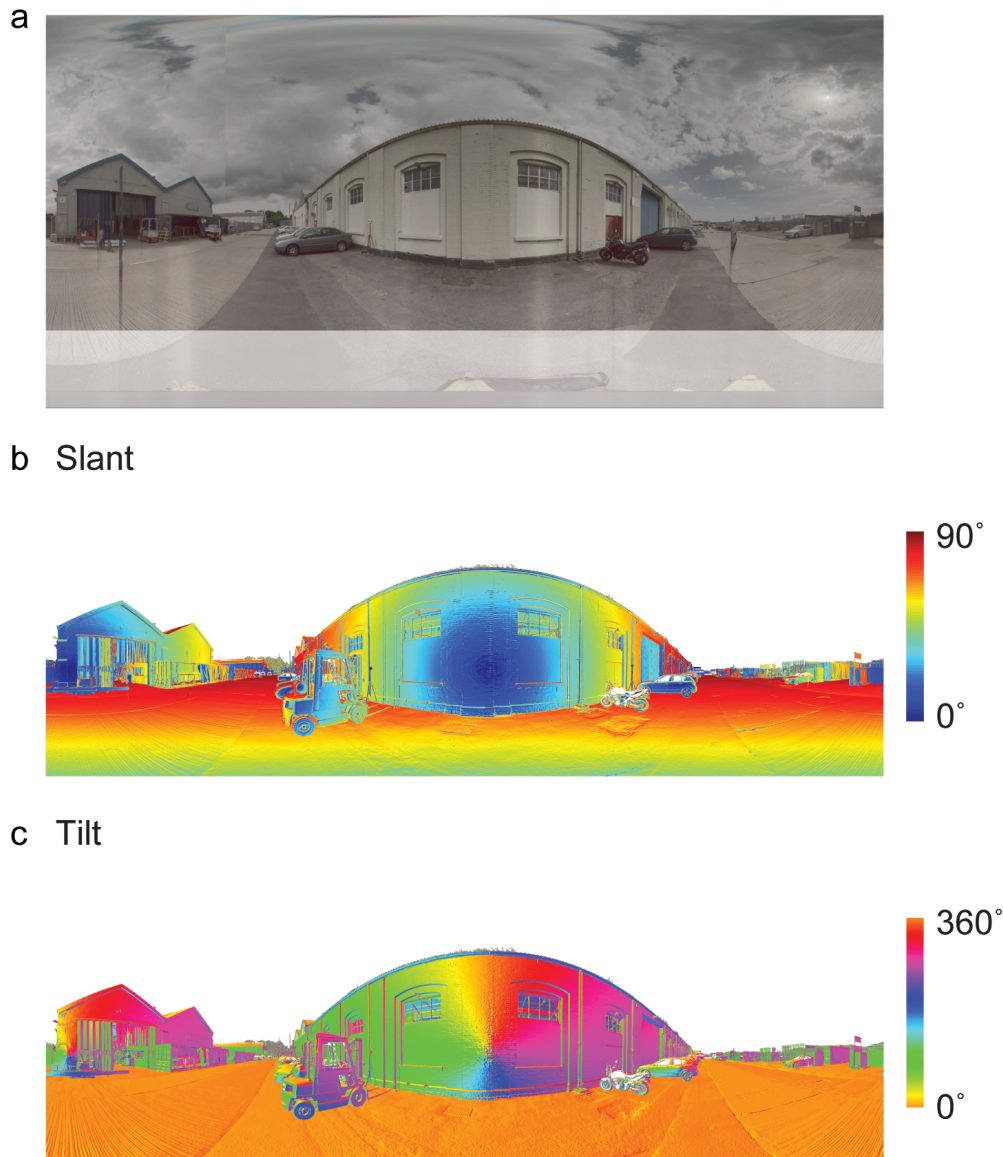

**Figure S2. Surface attitude estimation for an example outdoor built scene.** a) Spheron image; masked regions correspond to the low elevation region not captured by LiDAR. b) Egocentric slant. c) Egocentric tilt.

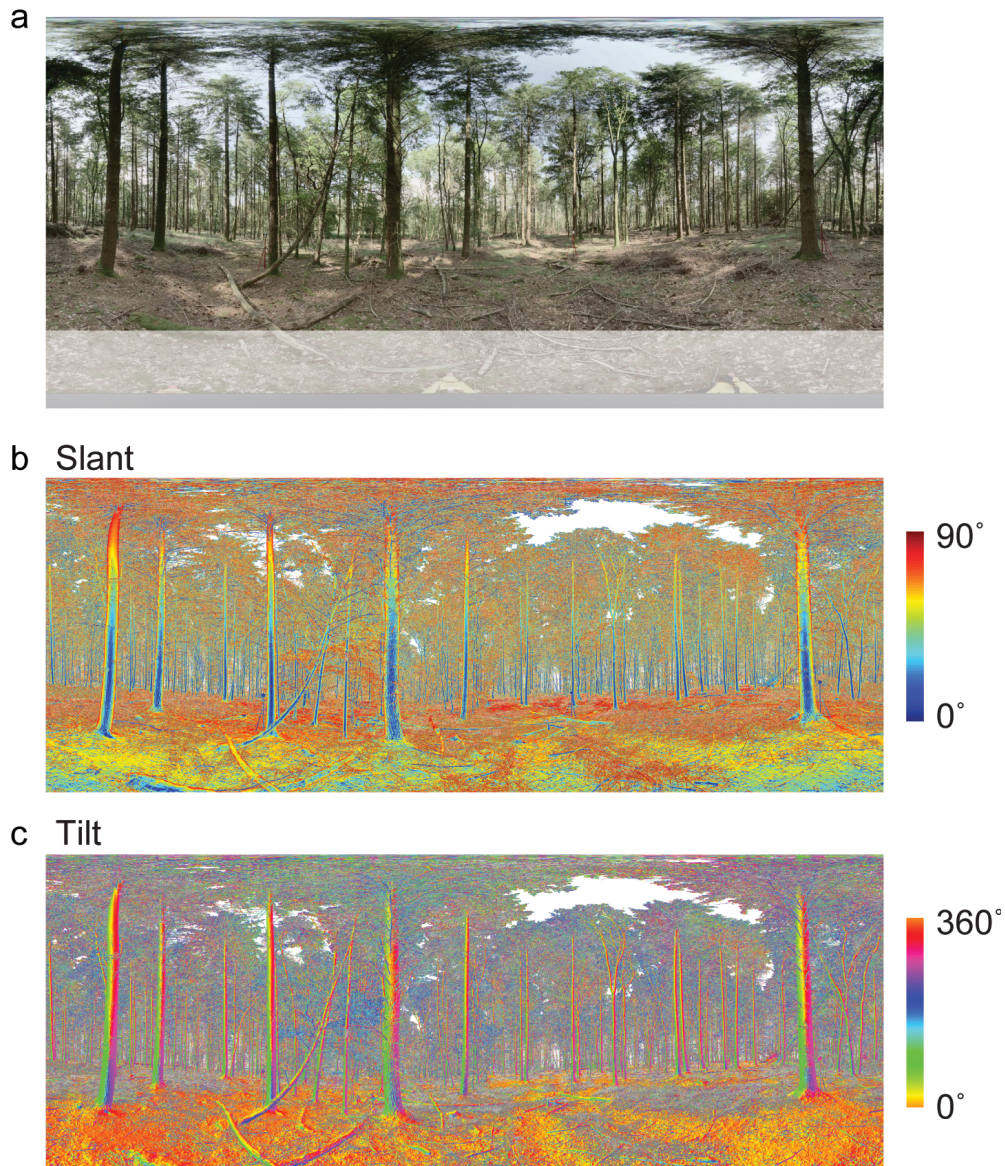

**Figure S3. Surface attitude estimation for an example outdoor natural scene.** a) Spheron image; masked regions correspond to the low elevation region not captured by LiDAR. b) Egocentric slant. c) Egocentric tilt.
